# Supplementary material for: Climatological occurrences of hail and tornadoes associated with mesoscale convective systems in the United States
Source: Copernicus journal article supplement (doi:10.5194/nhess-23-3823-2023), 2023-12-14
Supplement: Supplementary file 1 [file nhess-23-3823-2023-supplement.pdf]

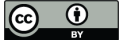

*Supplement of*

## **Climatological occurrences of hail and tornadoes associated with mesoscale convective systems in the United States**

**Jingyu Wang et al.**

*Correspondence to:* Jingyu Wang ([jingyu.wang@nie.edu.sg](mailto:jingyu.wang@nie.edu.sg)) and Jiwen Fan ([fanj@anl.gov](mailto:fanj@anl.gov))

The copyright of individual parts of the supplement might differ from the article licence.

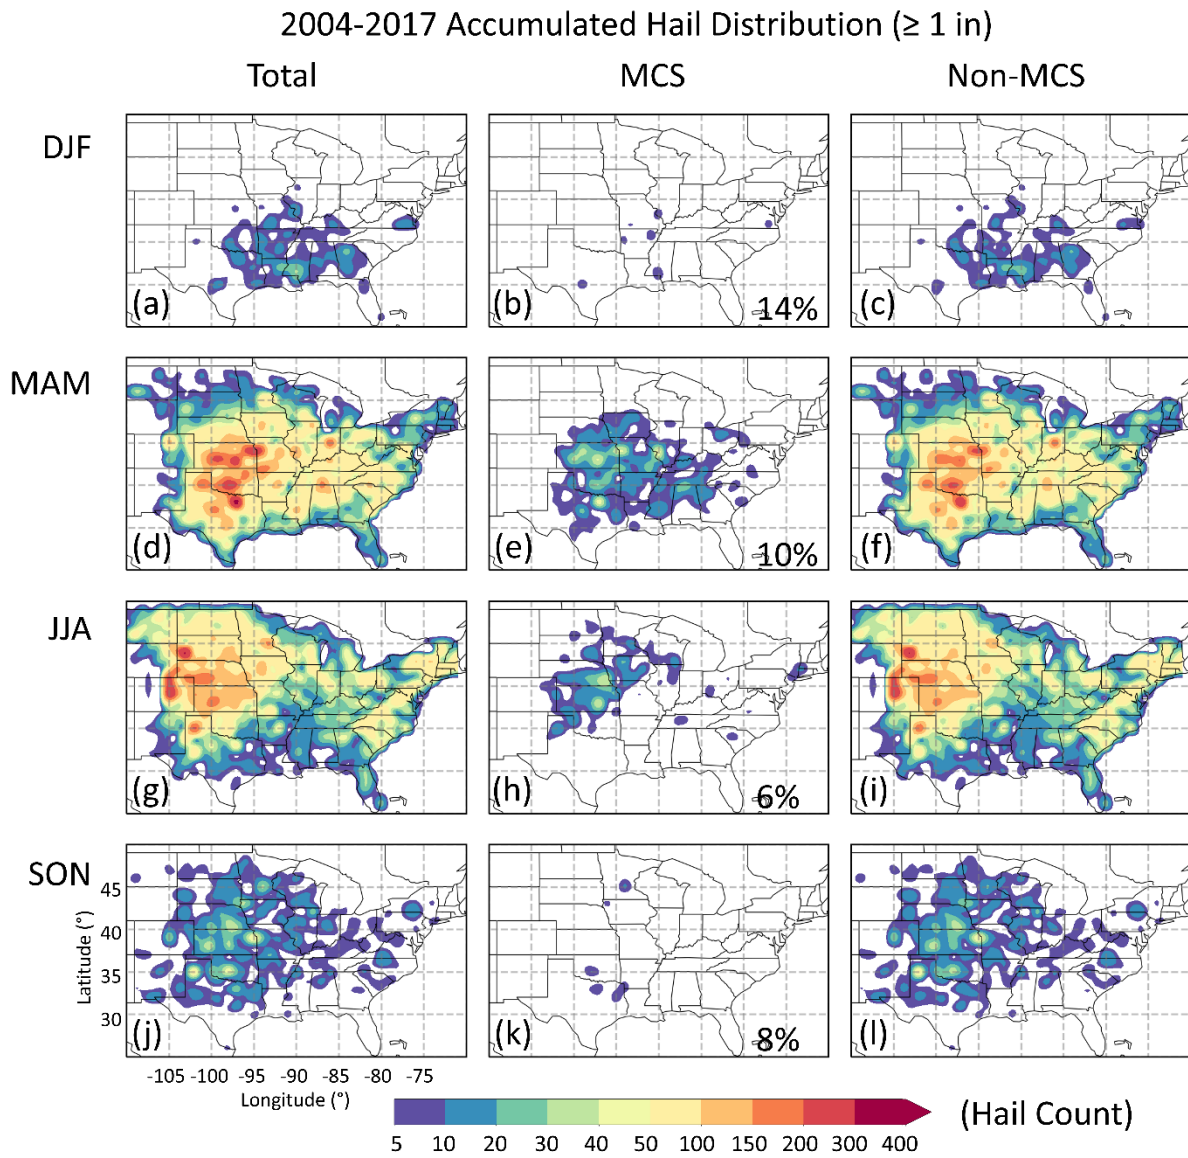

15

16 **Figure S1.** Same as Figure 3 but using 8 km convective aggregation radius.

2004-2017 Accumulated Tornado Distribution ( $\geq$  EF0)

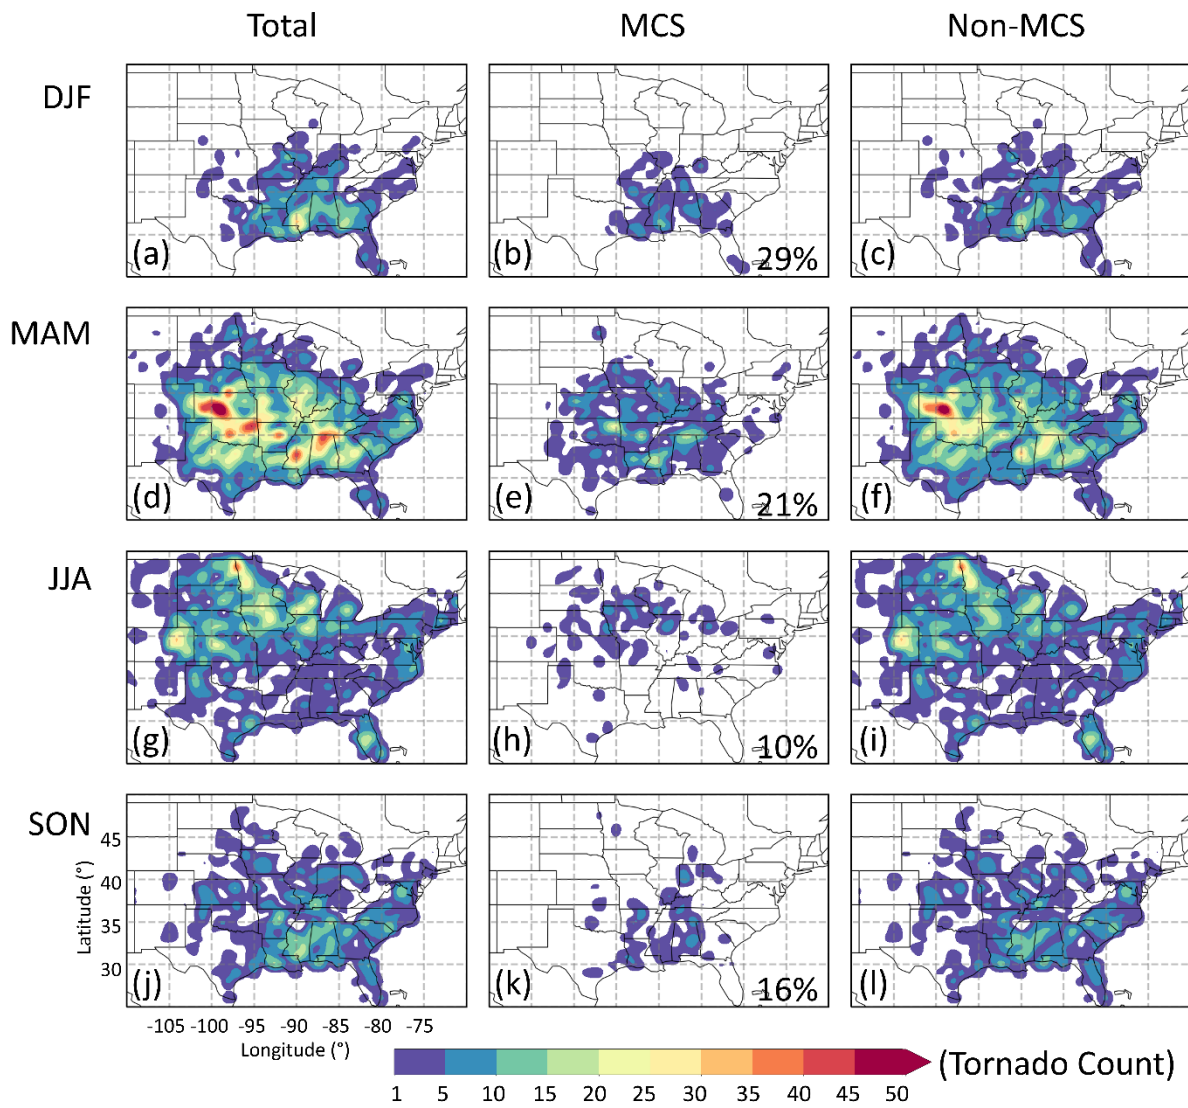

17

18 **Figure S2.** Same as Figure 4 but using 8 km convective aggregation radius.

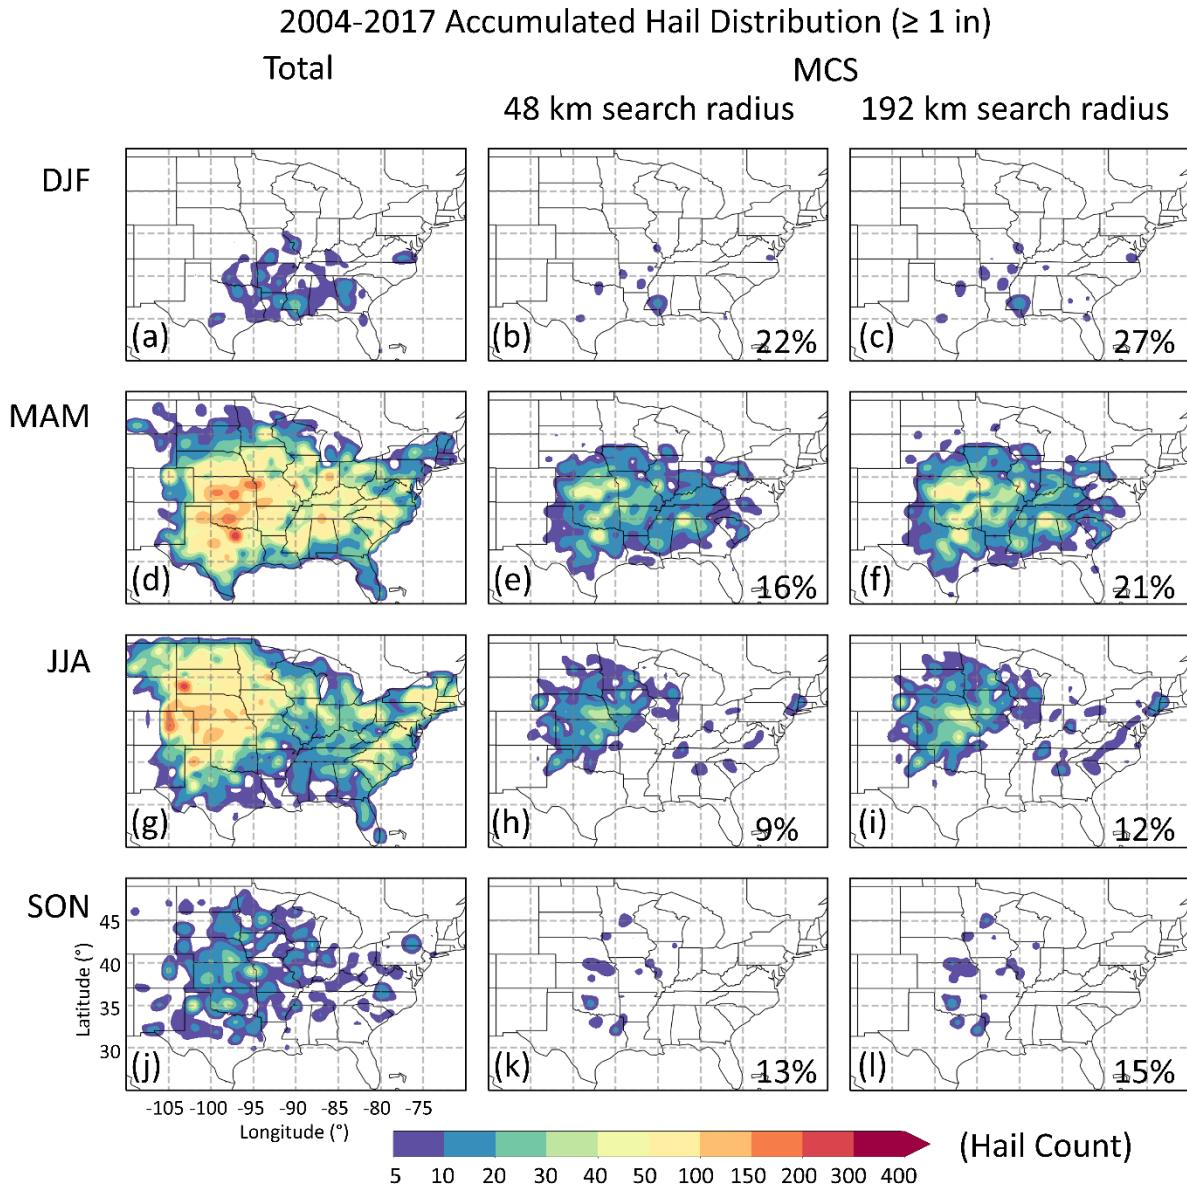

19

20 **Figure S3.** Same as Figure 3 but using varying stratiform search radius.

2004-2017 Accumulated Tornado Distribution ( $\geq$  EF0)

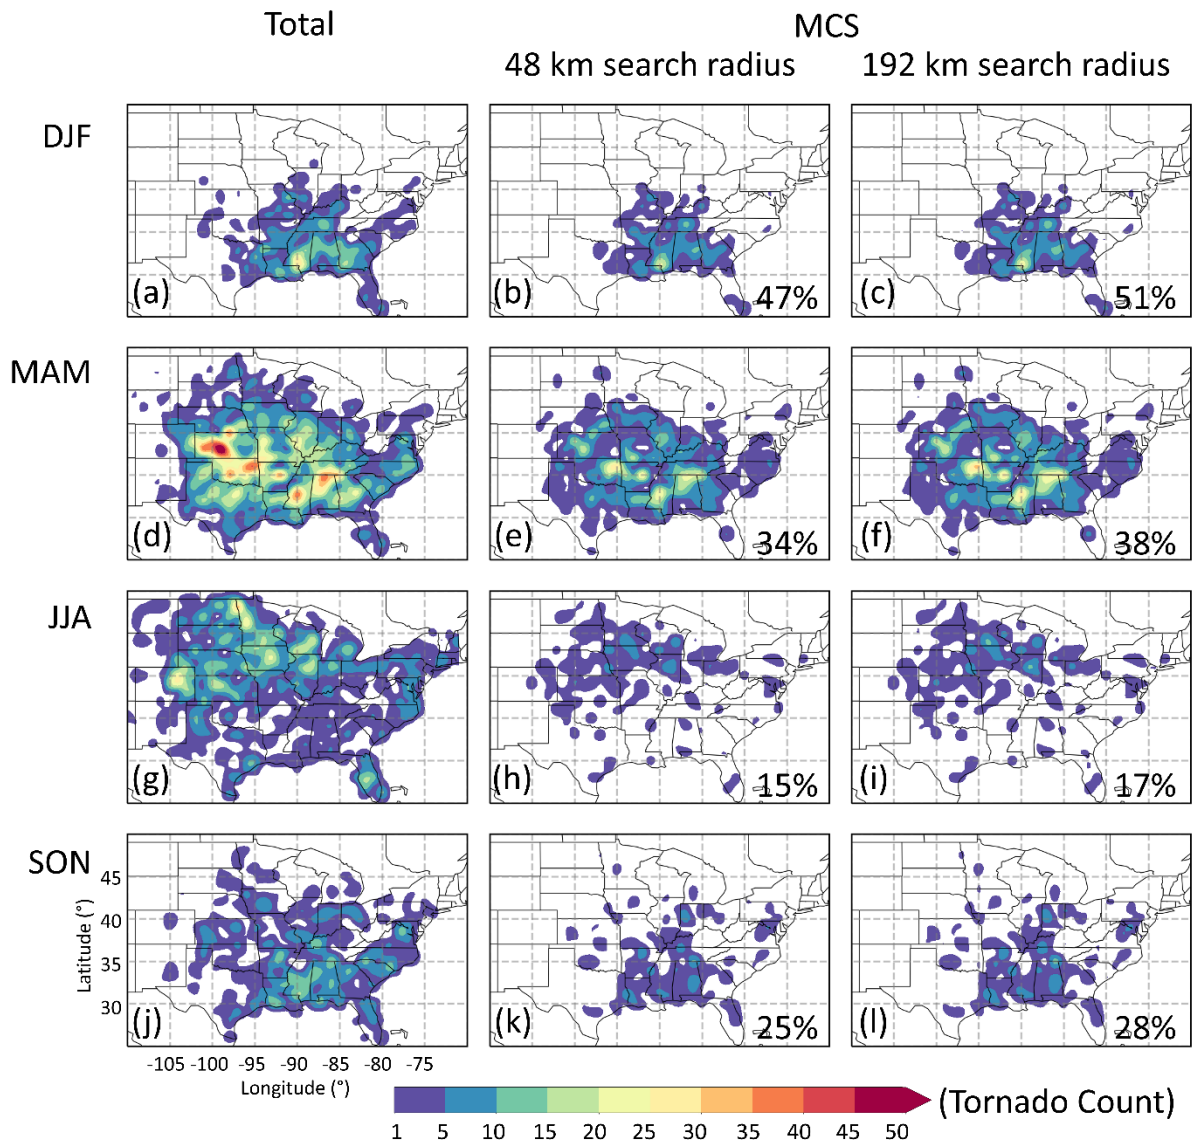

21

22 **Figure S4.** Same as Figure 4 but using varying stratiform search radius.

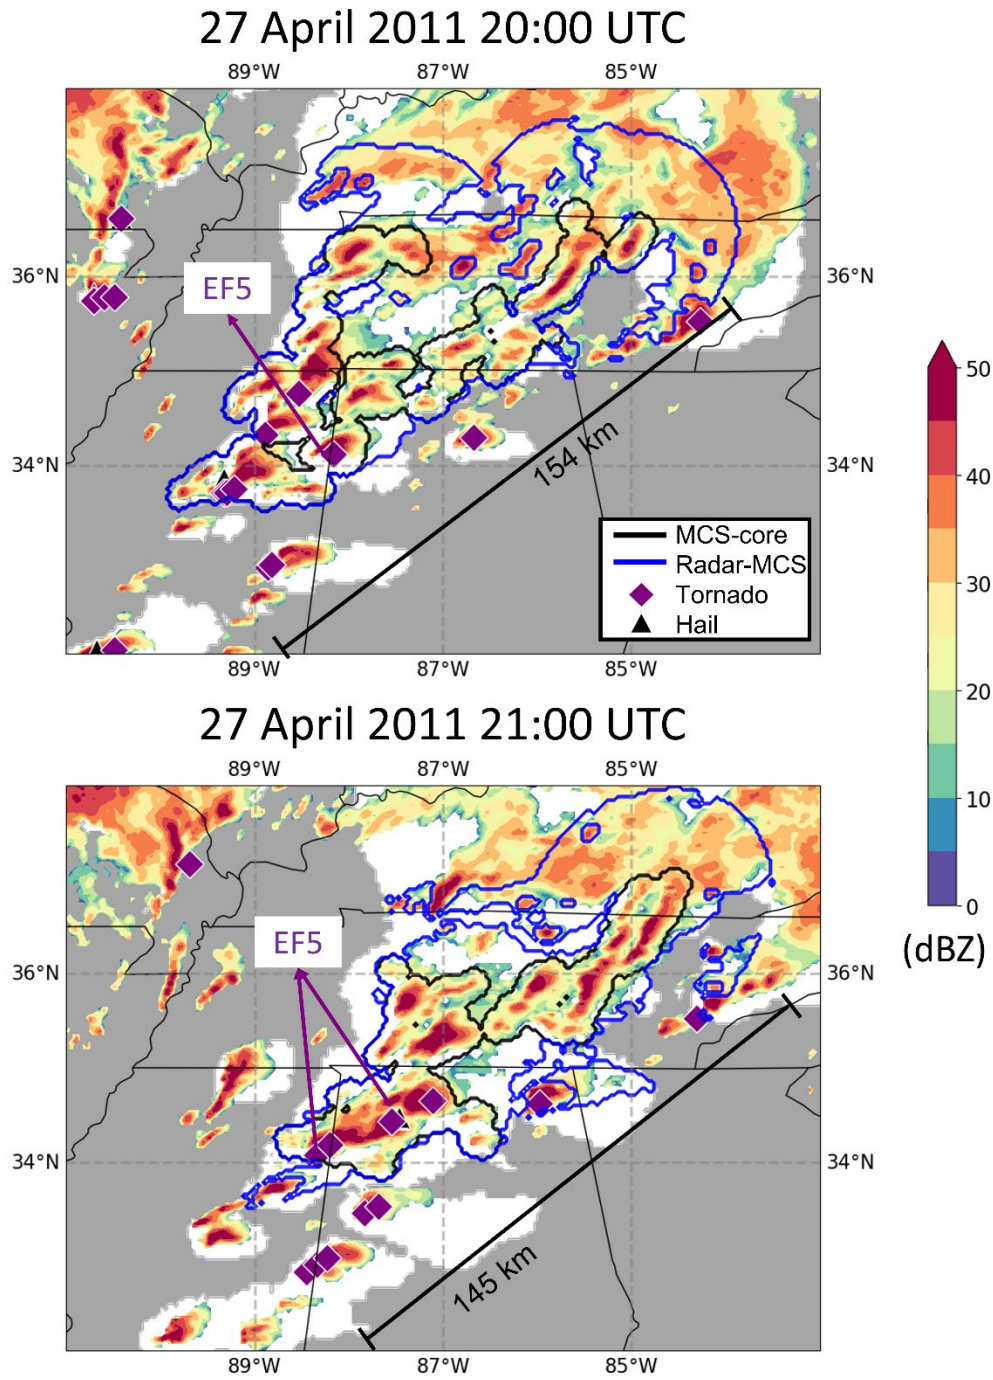

23

24 **Figure S5.** Same as Figure 2 but for (a) 20:00 UTC, 27 April 2011 and (b) 21:00 UTC, 27 April

25 2011.

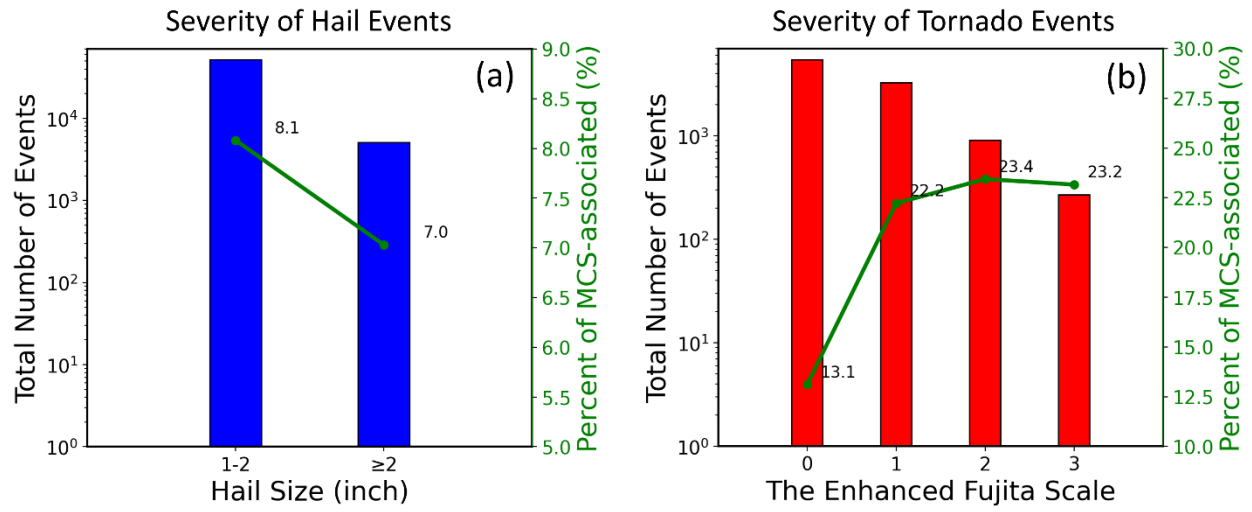

26

27 **Figure S6.** Same as Figure 7 but convective aggregation radius of 8 km.

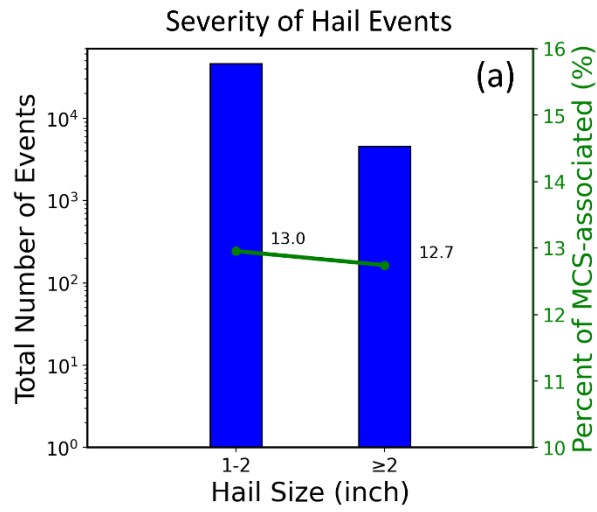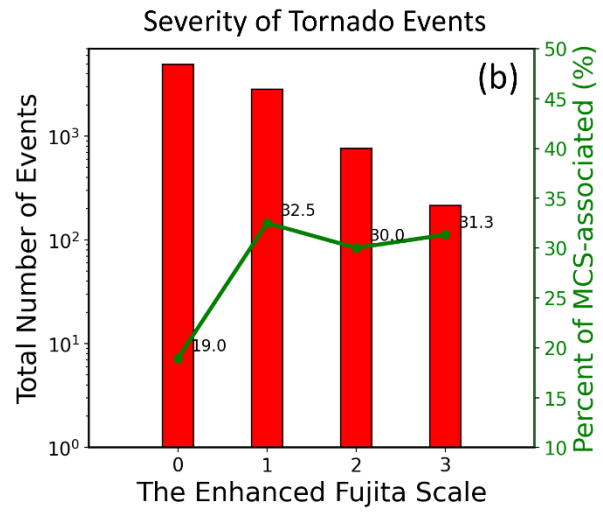

28

29 **Figure S7.** Same as Figure 7 but excluding the year of 2011.

30
